# Supplementary material for: Limited evidence of benefits of patient operated intelligent primary care triage tools: findings of a literature review
Source: PubMed Central journal article supplement — BMJ Health Care Inform. 2020 May 7;27(1):e100114. doi: 10.1136/bmjhci-2019-100114 (PMC7245402; doi:10.1136/bmjhci-2019-100114), 2020-05-07
Supplement: bmjhci-2019-100114supp002.pdf [file bmjhci-2019-100114supp002.pdf]

Table 1 (Article Selection)

|                                                      | Search Algorithm                                                                                                                                                                                                                                                                                                                                                                                                                                                                                                                                                                                                                           | Does meet not criteria by title | Articles Retrieved | Does not meet criteria by Abstract | Articles Retrieved | Does not meet criteria by whole article reading | Articles Included |
|------------------------------------------------------|--------------------------------------------------------------------------------------------------------------------------------------------------------------------------------------------------------------------------------------------------------------------------------------------------------------------------------------------------------------------------------------------------------------------------------------------------------------------------------------------------------------------------------------------------------------------------------------------------------------------------------------------|---------------------------------|--------------------|------------------------------------|--------------------|-------------------------------------------------|-------------------|
| <b>PubMed</b>                                        | (((((("General Practice"[Mesh] OR "Primary Health Care"[Mesh])) AND ("Triage"[Mesh] OR "Referral and Consultation"[Mesh])) AND (((("Artificial Intelligence"[Mesh] OR "Decision Support Systems, Clinical"[Mesh]) OR "Internet"[Mesh])) OR ("Triage"[Mesh] AND "Artificial Intelligence"[Mesh]) N 279                                                                                                                                                                                                                                                                                                                                      |                                 |                    |                                    |                    |                                                 |                   |
| <b>Cochrane</b>                                      | Date Run: 17/04/2019 12:41:17<br>ID Search Hits<br>#1 MeSH descriptor: [General Practice] explode all trees 2387<br>#2 MeSH descriptor: [Primary Health Care] explode all trees 6491<br>#3 MeSH descriptor: [Triage] explode all trees 265<br>#4 MeSH descriptor: [Referral and Consultation] explode all trees 2120<br>#5 MeSH descriptor: [Artificial Intelligence] explode all trees 944<br>#6 MeSH descriptor: [Decision Support Systems, Clinical] explode all trees 325<br>#7 MeSH descriptor: [Internet] explode all trees 3451<br>#8 #1OR#2 8497<br>#9 #3OR#4 2352<br>#10 #5OR#6OR#7 4673<br>#11 #8AND#9AND#10 22<br>#12 #3AND#5 0 |                                 |                    |                                    |                    |                                                 |                   |
| <b>Reference Lists</b>                               |                                                                                                                                                                                                                                                                                                                                                                                                                                                                                                                                                                                                                                            | 257                             |                    |                                    |                    |                                                 |                   |
| <b>N Results</b>                                     |                                                                                                                                                                                                                                                                                                                                                                                                                                                                                                                                                                                                                                            | 558                             | 464                | 94                                 | 68                 | 26                                              | 9                 |
| <b>Failing to meet inclusion criteria</b>            |                                                                                                                                                                                                                                                                                                                                                                                                                                                                                                                                                                                                                                            |                                 |                    |                                    |                    |                                                 |                   |
| <b>Not - Patient operated program</b>                |                                                                                                                                                                                                                                                                                                                                                                                                                                                                                                                                                                                                                                            |                                 | 46                 |                                    | 22                 |                                                 | 2                 |
| <b>Not - Unselected population</b>                   |                                                                                                                                                                                                                                                                                                                                                                                                                                                                                                                                                                                                                                            |                                 | 13                 |                                    | 1                  |                                                 |                   |
| <b>Not - Seeking initial contact</b>                 |                                                                                                                                                                                                                                                                                                                                                                                                                                                                                                                                                                                                                                            |                                 | 9                  |                                    | 1                  |                                                 |                   |
| <b>Not - Digital triage tool</b>                     |                                                                                                                                                                                                                                                                                                                                                                                                                                                                                                                                                                                                                                            |                                 | 249                |                                    | 24                 |                                                 | 5                 |
| <b>Not - Some level of AI</b>                        |                                                                                                                                                                                                                                                                                                                                                                                                                                                                                                                                                                                                                                            |                                 | 5                  |                                    | 2                  |                                                 |                   |
| <b>Meets exclusion criteria</b>                      |                                                                                                                                                                                                                                                                                                                                                                                                                                                                                                                                                                                                                                            |                                 |                    |                                    |                    |                                                 |                   |
| <b>Emergency department</b>                          |                                                                                                                                                                                                                                                                                                                                                                                                                                                                                                                                                                                                                                            |                                 | 13                 |                                    | 9                  |                                                 | 2                 |
| <b>Other language than English</b>                   |                                                                                                                                                                                                                                                                                                                                                                                                                                                                                                                                                                                                                                            |                                 | 4                  |                                    |                    |                                                 |                   |
| <b>Studies in specifik symptoms / Condition</b>      |                                                                                                                                                                                                                                                                                                                                                                                                                                                                                                                                                                                                                                            |                                 | 116                |                                    | 9                  |                                                 |                   |
| <b>Conventional triage, telephone, video</b>         |                                                                                                                                                                                                                                                                                                                                                                                                                                                                                                                                                                                                                                            |                                 | 9                  |                                    |                    |                                                 |                   |
| <b>Initial decision made by health professionals</b> |                                                                                                                                                                                                                                                                                                                                                                                                                                                                                                                                                                                                                                            |                                 |                    |                                    |                    |                                                 |                   |
